# Supplementary material for: Preparation and Characterization of Thermoresponsive Polymer Scaffolds Based on Poly(N-isopropylacrylamide-co-N-tert-butylacrylamide) for Cell Culture
Source: MDPI journal article supplement (doi:10.3390/technologies11050145), 2023-10-18
Supplement: s1 [file s1]

## Supplementary Information for

# Preparation and characterization of thermoresponsive polymer scaffolds based on poly(N-isopropylacrylamide-co-N-tert-butylacrylamide) for cell culture

Gilyana K. Kazakova, Victoria S. Presniakova, Yuri M. Efremov, Svetlana L. Kotova, Anastasia A. Frolova, Sergei V. Kostjuk, Yury A. Rochev and Peter S. Timashev

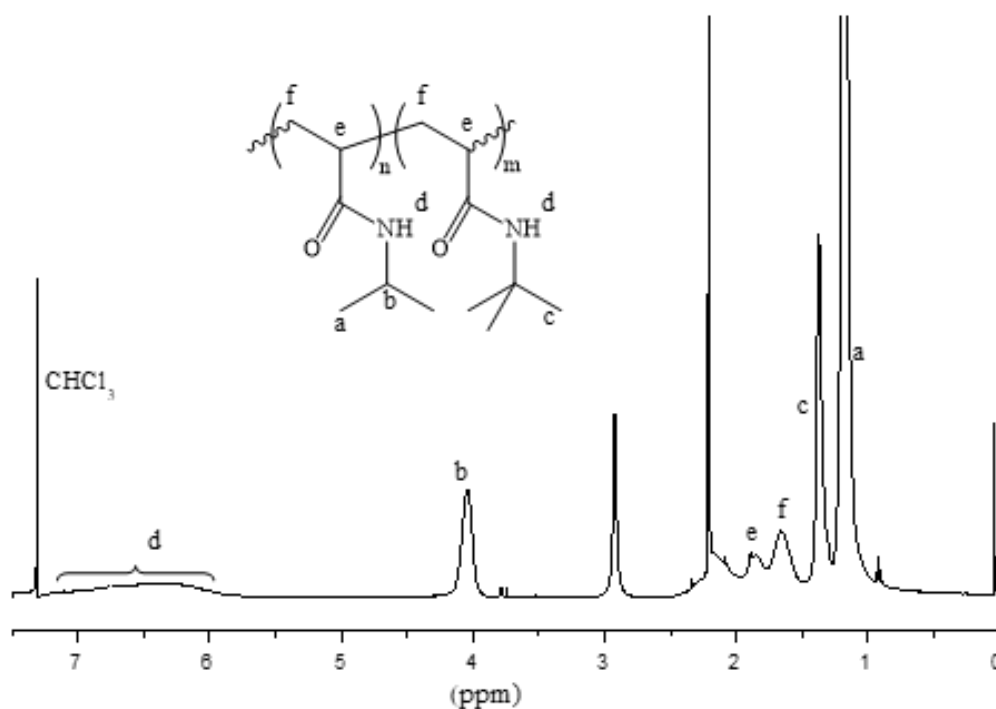

Figure S1.  $^1\text{H}$  NMR spectrum of poly(N-isopropylacrylamide-co-N-tert-butylacrylamide) P(NIPAM-co-NtBA) copolymer (NIPAM:NtBA=86/14).

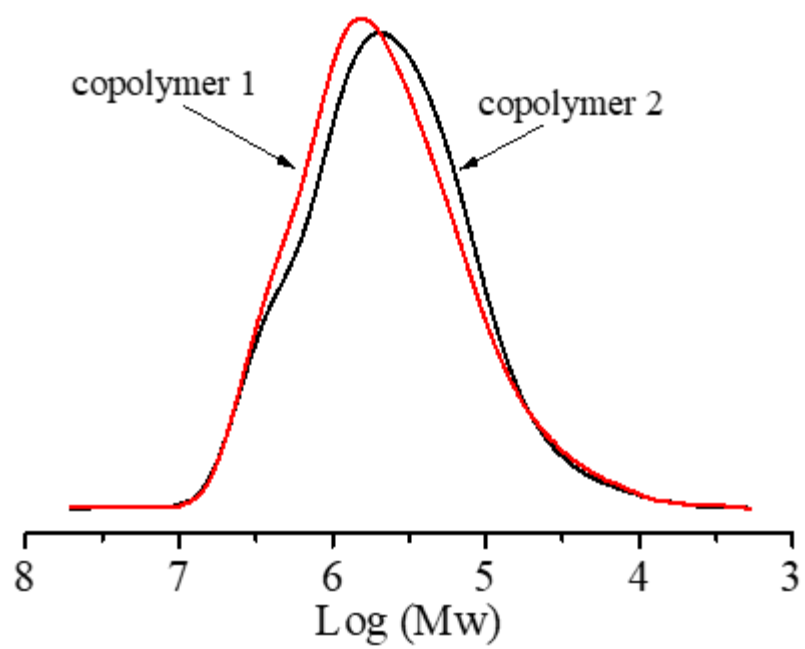

Figure S2. Size-exclusion chromatography (SEC) traces of poly(N-isopropylacrylamide-*co*-N-*tert*-butylacrylamide)s used in this study.
